# Supplementary material for: Body dysmorphic disorder and self-esteem: a meta-analysis
Source: Springer Nature journal article supplement (doi:10.1186/s12888-021-03185-3), 2021-06-15
Supplement: MOESM2 [file 19262506]

**Additional File 2. Standard deviation estimates for the BDD symptom severity measures used for artifact correction.**

| <b>BDD measure</b>                                | <b>Standard deviation used for artifact correction</b> | <b>Source</b>                                                                                                                                                                                                             | <b>Sample description</b>                                        |
|---------------------------------------------------|--------------------------------------------------------|---------------------------------------------------------------------------------------------------------------------------------------------------------------------------------------------------------------------------|------------------------------------------------------------------|
| BDD-YBOCS, clinician-administered and self-report | 8.86 <sup>a</sup>                                      | Phillips B, Moulding R, Kyrios M, Nedeljkovic M, Mancuso S. The relationship between body dysmorphic disorder symptoms and self-construals. <i>Clin Psychol.</i> 2011;15(1):10–6.                                         | Community and student sample (n=194)                             |
| BDDE / BDDE-SR                                    | 28.26                                                  | Boroughs MS, Krawczyk R, Thompson JK. Body dysmorphic disorder among diverse racial/ethnic and sexual orientation groups: prevalence estimates and associated factors. <i>Sex Roles.</i> 2010;63(9):725–37.               | Undergraduate students (n=1041)                                  |
| FKS                                               | 9.85                                                   | Möllmann A, Dietel FA, Hunger A, Buhlmann U. Prevalence of body dysmorphic disorder and associated features in German adolescents: a self-report survey. <i>Psychiatry Res.</i> 2017;254:263–7.                           | Adolescents and young adults, 96.1% high school students (n=308) |
| QDC                                               | 38.46                                                  | Cerea S, Bottesi G, Grisham JR, Ghisi M. Body dysmorphic disorder and its associated psychological and psychopathological features in an Italian community sample. <i>Int J Psychiatry Clin Pract.</i> 2018;22(3):206–14. | Community sample with 59.35% students (n=615)                    |

|     |      |                                                                                                                                                                                                           |                                              |
|-----|------|-----------------------------------------------------------------------------------------------------------------------------------------------------------------------------------------------------------|----------------------------------------------|
| DCQ | 4.70 | Schmidt J, Martin A. Appearance teasing and mental health: gender differences and mediation effects of appearance-based rejection sensitivity and dysmorphic concerns. <i>Front Psychol.</i> 2019;10:579. | Community sample with 42.7% students (n=501) |
|-----|------|-----------------------------------------------------------------------------------------------------------------------------------------------------------------------------------------------------------|----------------------------------------------|

*Note:* We tried to use standard deviation estimates from large community samples. If these were not available, we used estimates from student samples or from other (shorter/self-report) versions of the BDD measures. BDD-YBOCS, Yale-Brown Obsessive-Compulsive Scale Modified for Body Dysmorphic Disorder; BDDE, Body Dysmorphic Disorder Examination; BDDE-SR, Body Dysmorphic Disorder Examination-Self Report; FKS, Fragebogen körperdysmorpher Symptome; QDC, Questionario sul Dismorfismo Corporeo; DCQ, Dysmorphic Concern Questionnaire.

<sup>a</sup> A standard deviation of 7.38 was observed in this study. As this study applied only 10 out of 12 items from the BDD-YBOCS, the standard deviation was multiplied by 1.2 for artifact correction.
