# Supplementary material for: Body dysmorphic disorder and self-esteem: a meta-analysis
Source: Springer Nature journal article supplement (doi:10.1186/s12888-021-03185-3), 2021-06-15

**Additional File 3. Funnel plot for the meta-analysis of uncorrected zero-order correlations.**

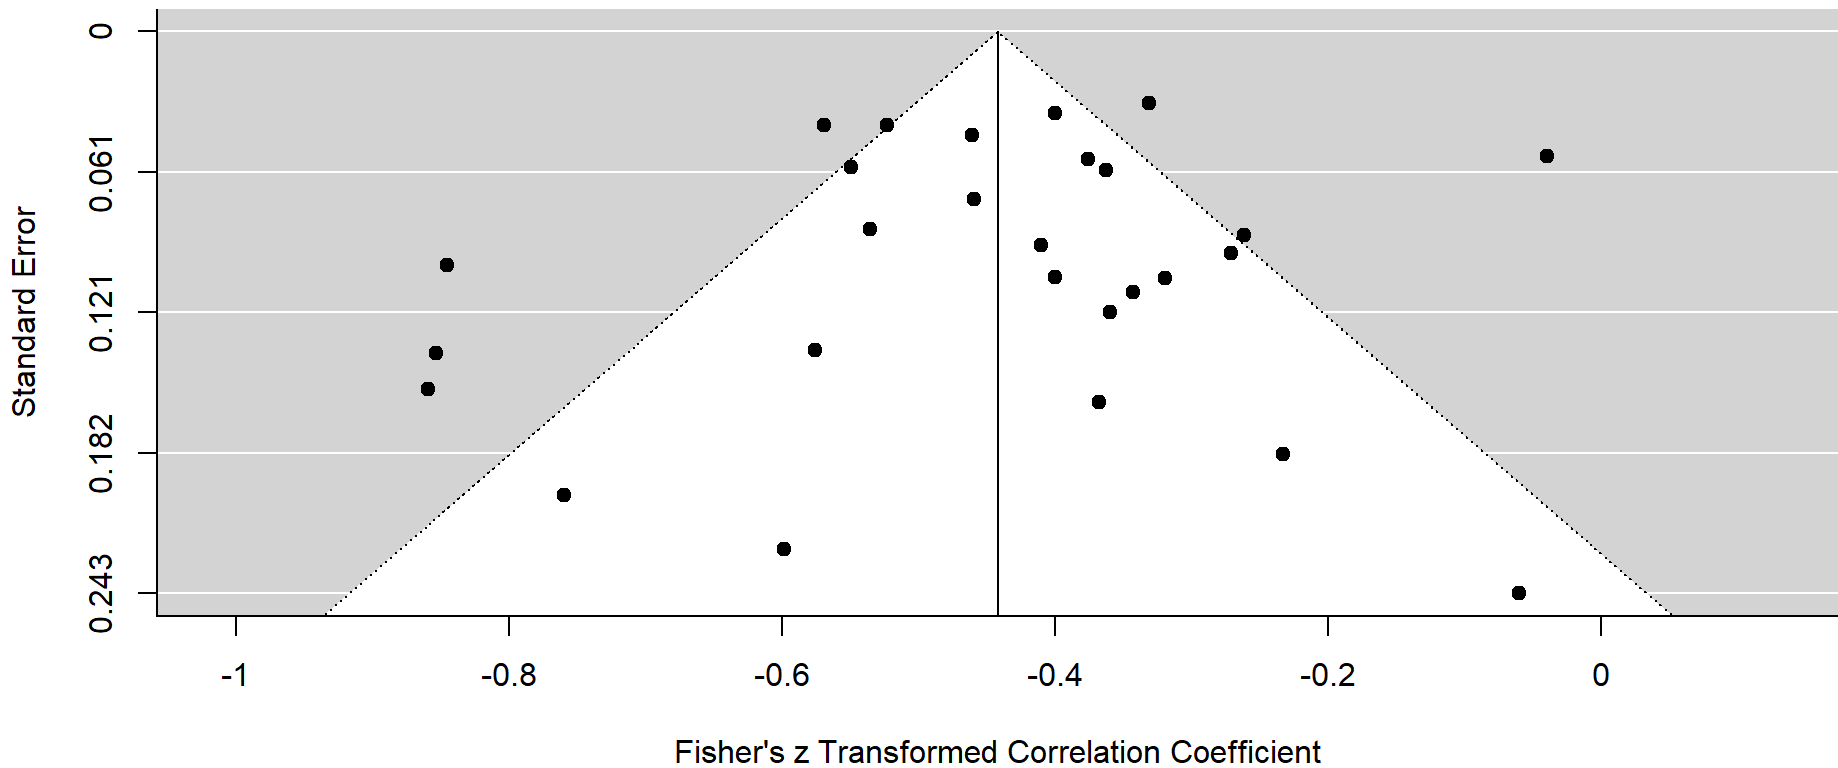

Supplement: MOESM3 [file 19262506]
